# Supplementary material
Source: publisher figshare collection journal article supplement (https://acs.figshare.com/ndownloader/files/17552855)
Supplement: Supplementary file 1 [file 17552855]

## Sheet: Sheet1
Table S10. The dataset of optimum MRM parameters of the NGPs from human serum
Protein access number	Protein description	Peptide sequence	MRM pairs		Precursor ion charge	Fragment ions	DP(V)	CE(eV)
			Q1	Q3
B9A064	Immunoglobulin lambda-like polypeptide	VTVLGQPK	421.26	201.12	2+	b2+	61.8	23.5
B9A064	Immunoglobulin lambda-like polypeptide	VTVLGQPK	421.26	641.4	2+	y6+	61.8	23.5
B9A064	Immunoglobulin lambda-like polypeptide	VTVLGQPK	421.26	542.33	2+	y5+	61.8	23.5
O14791	Apolipoprotein L1	VTEPISAESGEQVER	815.9	1091.5	2+	y10+	90.6	40.9
O14791	Apolipoprotein L1	VTEPISAESGEQVER	815.9	804.38	2+	y7+	90.6	40.9
O75636	Ficolin-3	YGIDWASGR	512.75	691.32	2+	y6+	68.5	27.6
O75636	Ficolin-3	YGIDWASGR	512.75	576.29	2+	y5+	68.5	27.6
O75636	Ficolin-3	YGIDWASGR	512.75	390.21	2+	y4+	68.5	27.6
O75882	Attractin	LTLTPWVGLR	578.35	429.27	2+	b4+	73.3	30.4
O75882	Attractin	LTLTPWVGLR	578.35	941.56	2+	y8+	73.3	30.4
O75882	Attractin	LTLTPWVGLR	578.35	727.42	2+	y6+	73.3	30.4
O75882	Attractin	ALYVHGGYK	504.27	823.41	2+	y7+	67.9	27.2
O75882	Attractin	ALYVHGGYK	504.27	660.35	2+	y6+	67.9	27.2
O75882	Attractin	ALYVHGGYK	504.27	561.28	2+	y5+	67.9	27.2
P00450	Ceruloplasmin	TTIEKPVWLGFLGPIIK	956.57	1143.69	2+	y10+	100.9	47.1
P00450	Ceruloplasmin	TTIEKPVWLGFLGPIIK	956.57	844.53	2+	y8+	100.9	47.1
P00450	Ceruloplasmin	NNEGTYYSPNYNPQSR	952.41	1225.56	2+	y10+	100.5	46.9
P00450	Ceruloplasmin	NNEGTYYSPNYNPQSR	952.41	1062.5	2+	y9+	100.5	46.9
P00450	Ceruloplasmin	NNEGTYYSPNYNPQSR	952.41	975.46	2+	y8+	100.5	46.9
P00450	Ceruloplasmin	EYTDASFTNR	602.27	624.31	2+	y5+	75	31.5
P00450	Ceruloplasmin	EYTDASFTNR	602.27	537.28	2+	y4+	75	31.5
P00450	Ceruloplasmin	EYTDASFTNR	602.27	390.21	2+	y3+	75	31.5
P00450	Ceruloplasmin	ALYLQYTDETFR	760.38	1172.56	2+	y9+	86.5	38.5
P00450	Ceruloplasmin	ALYLQYTDETFR	760.38	1059.47	2+	y8+	86.5	38.5
P00450	Ceruloplasmin	ALYLQYTDETFR	760.38	931.42	2+	y7+	86.5	38.5
P00734	Prothrombin	YGFYTHVFR	595.29	822.43	2+	y6+	74.5	31.2
P00734	Prothrombin	YGFYTHVFR	595.29	659.36	2+	y5+	74.5	31.2
P00734	Prothrombin	YGFYTHVFR	595.29	558.31	2+	y4+	74.5	31.2
P00734	Prothrombin	ETWTANVGK	503.25	589.33	2+	y6+	67.8	27.1
P00734	Prothrombin	ETWTANVGK	503.25	488.28	2+	y5+	67.8	27.1
P00734	Prothrombin	ETWTANVGK	503.25	417.25	2+	y4+	67.8	27.1
P00736	Complement	TLDEFTIIQNLQPQYQFR	1127.58	966.48	2+	y7+	113.3	54.6
P00736	Complement	TLDEFTIIQNLQPQYQFR	1127.58	838.42	2+	y6+	113.3	54.6
P00738	Haptoglobin	VTSIQDWVQK	602.32	1003.52	2+	y8+	75	31.5
P00738	Haptoglobin	VTSIQDWVQK	602.32	803.4	2+	y6+	75	31.5
P00738	Haptoglobin	VTSIQDWVQK	602.32	675.35	2+	y5+	75	31.5
P00738	Haptoglobin	VGYVSGWGR	490.75	661.34	2+	y6+	66.9	26.6
P00738	Haptoglobin	VGYVSGWGR	490.75	562.27	2+	y5+	66.9	26.6
P00738	Haptoglobin	VGYVSGWGR	490.75	475.24	2+	y4+	66.9	26.6
P00739	Haptoglobin-related protein	VGYVSGWGQSDNFK	772.36	1125.5	2+	y10+	87.4	39
P00739	Haptoglobin-related protein	VGYVSGWGQSDNFK	772.36	1038.46	2+	y9+	87.4	39
P00739	Haptoglobin-related protein	VGYVSGWGQSDNFK	772.36	795.36	2+	y7+	87.4	39
P00740	Coagulation factor IX	SALVLQYLR	531.82	791.48	2+	y6+	69.9	28.4
P00740	Coagulation factor IX	SALVLQYLR	531.82	692.41	2+	y5+	69.9	28.4
P00740	Coagulation factor IX	SALVLQYLR	531.82	451.27	2+	y3+	69.9	28.4
P00740	Coagulation factor IX	FGSGYVSGWGR	586.78	661.34	2+	y6+	73.9	30.8
P00740	Coagulation factor IX	FGSGYVSGWGR	586.78	562.27	2+	y5+	73.9	30.8
P00740	Coagulation factor IX	FGSGYVSGWGR	586.78	475.24	2+	y4+	73.9	30.8
P00748	Coagulation factor XII	VVGGLVALR	442.29	199.14	2+	b2+	63.4	24.5
P00748	Coagulation factor XII	VVGGLVALR	442.29	426.27	2+	b5+	63.4	24.5
P00748	Coagulation factor XII	VVGGLVALR	442.29	685.44	2+	y7+	63.4	24.5
P00751	Complement factor B	YGLVTYATYPK	638.33	942.49	2+	y8+	77.7	33.1
P00751	Complement factor B	YGLVTYATYPK	638.33	843.42	2+	y7+	77.7	33.1
P00751	Complement factor B	YGLVTYATYPK	638.33	742.38	2+	y6+	77.7	33.1
P00751	Complement factor B	VSEADSSNADWVTK	754.85	1122.51	2+	y10+	86.1	38.2
P00751	Complement factor B	VSEADSSNADWVTK	754.85	1007.48	2+	y9+	86.1	38.2
P00751	Complement factor B	VSEADSSNADWVTK	754.85	920.45	2+	y8+	86.1	38.2
P00751	Complement factor B	EAGIPEFYDYDVALIK	921.96	1246.64	2+	y10+	98.3	45.6
P00751	Complement factor B	EAGIPEFYDYDVALIK	921.96	1099.57	2+	y9+	98.3	45.6
P01008	Antithrombin-III	ANRPFLVFIR	411.58	699.39	3+	b6+	61.1	32.9
P01008	Antithrombin-III	ANRPFLVFIR	411.58	534.34	3+	y4+	61.1	32.9
P01008	Antithrombin-III	ANRPFLVFIR	411.58	435.27	3+	y3+	61.1	32.9
P01009	Angiotensinogen	SVLGQLGITK	508.31	187.11	2+	b2+	68.2	27.4
P01009	Angiotensinogen	SVLGQLGITK	508.31	829.51	2+	y8+	68.2	27.4
P01009	Angiotensinogen	SVLGQLGITK	508.31	716.43	2+	y7+	68.2	27.4
P01009	Angiotensinogen	LSITGTYDLK	555.81	910.49	2+	y8+	71.6	29.5
P01009	Angiotensinogen	LSITGTYDLK	555.81	797.4	2+	y7+	71.6	29.5
P01009	Angiotensinogen	LSITGTYDLK	555.81	696.36	2+	y6+	71.6	29.5
P01009	Angiotensinogen	ITPNLAEFAFSLYR	821.44	1104.57	2+	b10+	91	41.1
P01009	Angiotensinogen	ITPNLAEFAFSLYR	821.44	1103.55	2+	y9+	91	41.1
P01009	Angiotensinogen	ITPNLAEFAFSLYR	821.44	538.3	2+	y4+	91	41.1
P01011	Alpha-1-antichymotrypsin	NLAVSQVVHK	547.82	299.17	2+	b3+	71.1	29.1
P01011	Alpha-1-antichymotrypsin	NLAVSQVVHK	547.82	867.5	2+	y8+	71.1	29.1
P01011	Alpha-1-antichymotrypsin	NLAVSQVVHK	547.82	697.4	2+	y6+	71.1	29.1
P01011	Alpha-1-antichymotrypsin	ITLLSALVETR	608.37	775.43	2+	y7+	75.5	31.8
P01011	Alpha-1-antichymotrypsin	ITLLSALVETR	608.37	504.28	2+	y4+	75.5	31.8
P01011	Alpha-1-antichymotrypsin	ITLLSALVETR	608.37	405.21	2+	y3+	75.5	31.8
P01011	Alpha-1-antichymotrypsin	ADLSGITGAR	480.76	661.36	2+	y7+	66.2	26.2
P01011	Alpha-1-antichymotrypsin	ADLSGITGAR	480.76	574.33	2+	y6+	66.2	26.2
P01011	Alpha-1-antichymotrypsin	ADLSGITGAR	480.76	404.23	2+	y4+	66.2	26.2
P01019	Angiotensinogen	VLSALQAVQGLLVAQGR	862.01	530.3	2+	y5+	94	42.9
P01019	Angiotensinogen	VLSALQAVQGLLVAQGR	862.01	431.24	2+	y4+	94	42.9
P01019	Angiotensinogen	SLDFTELDVAAEK	719.36	1237.59	2+	y11+	83.6	36.7
P01019	Angiotensinogen	SLDFTELDVAAEK	719.36	975.5	2+	y9+	83.6	36.7
P01019	Angiotensinogen	SLDFTELDVAAEK	719.36	874.45	2+	y8+	83.6	36.7
P01019	Angiotensinogen	ALQDQLVLVAAK	634.88	956.58	2+	y9+	77.4	32.9
P01019	Angiotensinogen	ALQDQLVLVAAK	634.88	289.19	2+	y3+	77.4	32.9
P01023	Alpha-2-macroglobulin	QTVSWAVTPK	558.81	788.43	2+	y7+	71.9	29.6
P01023	Alpha-2-macroglobulin	QTVSWAVTPK	558.81	515.32	2+	y5+	71.9	29.6
P01023	Alpha-2-macroglobulin	QTVSWAVTPK	558.81	345.21	2+	y3+	71.9	29.6
P01023	Alpha-2-macroglobulin	QGIPFFGQVR	574.81	299.17	2+	b3+	73	30.3
P01023	Alpha-2-macroglobulin	QGIPFFGQVR	574.81	850.46	2+	y7+	73	30.3
P01023	Alpha-2-macroglobulin	QGIPFFGQVR	574.81	459.27	2+	y4+	73	30.3
P01023	Alpha-2-macroglobulin	QFSFPLSSEPFQGSYK	924.94	1129.52	2+	y10+	98.5	45.7
P01023	Alpha-2-macroglobulin	QFSFPLSSEPFQGSYK	924.94	826.41	2+	y7+	98.5	45.7
P01023	Alpha-2-macroglobulin	IAQWQSFQLEGGLK	802.93	1106.58	2+	y10+	89.7	40.3
P01023	Alpha-2-macroglobulin	IAQWQSFQLEGGLK	802.93	978.53	2+	y9+	89.7	40.3
P01023	Alpha-2-macroglobulin	GHFSISIPVK	542.81	195.09	2+	b2+	70.7	28.9
P01023	Alpha-2-macroglobulin	GHFSISIPVK	542.81	890.53	2+	y8+	70.7	28.9
P01023	Alpha-2-macroglobulin	GHFSISIPVK	542.81	743.47	2+	y7+	70.7	28.9
P01023	Alpha-2-macroglobulin	FEVQVTVPK	523.8	277.12	2+	b2+	69.3	28
P01023	Alpha-2-macroglobulin	FEVQVTVPK	523.8	770.48	2+	y7+	69.3	28
P01023	Alpha-2-macroglobulin	FEVQVTVPK	523.8	244.17	2+	y2+	69.3	28
P01023	Alpha-2-macroglobulin	AIGYLNTGYQR	628.33	1071.52	2+	y9+	76.9	32.6
P01023	Alpha-2-macroglobulin	AIGYLNTGYQR	628.33	851.44	2+	y7+	76.9	32.6
P01023	Alpha-2-macroglobulin	AIGYLNTGYQR	628.33	738.35	2+	y6+	76.9	32.6
P01024	Complement C3	VLLDGVQNPR	555.82	898.47	2+	y8+	71.6	29.5
P01024	Complement C3	VLLDGVQNPR	555.82	785.39	2+	y7+	71.6	29.5
P01024	Complement C3	VLLDGVQNPR	555.82	514.27	2+	y4+	71.6	29.5
P01024	Complement C3	SGSDEVQVGQQR	645.31	715.38	2+	y6+	78.2	33.4
P01024	Complement C3	SGSDEVQVGQQR	645.31	587.33	2+	y5+	78.2	33.4
P01024	Complement C3	SGSDEVQVGQQR	645.31	488.26	2+	y4+	78.2	33.4
P01024	Complement C3	IPIEDGSGEVVLSR	735.89	1147.56	2+	y11+	84.8	37.4
P01024	Complement C3	IPIEDGSGEVVLSR	735.89	1018.52	2+	y10+	84.8	37.4
P01024	Complement C3	IPIEDGSGEVVLSR	735.89	903.49	2+	y9+	84.8	37.4
P01024	Complement C3	IHWESASLLR	606.33	251.15	2+	b2+	75.3	31.7
P01024	Complement C3	IHWESASLLR	606.33	961.51	2+	y8+	75.3	31.7
P01024	Complement C3	IHWESASLLR	606.33	775.43	2+	y7+	75.3	31.7
P01024	Complement C3	HQQTVTIPPK	574.82	808.43	2+	b7+	73	30.3
P01024	Complement C3	HQQTVTIPPK	574.82	883.52	2+	y8+	73	30.3
P01024	Complement C3	HQQTVTIPPK	574.82	341.22	2+	y3+	73	30.3
P01024	Complement C3	GYTQQLAFR	542.28	762.43	2+	y6+	70.6	28.9
P01024	Complement C3	GYTQQLAFR	542.28	393.22	2+	y3+	70.6	28.9
P01024	Complement C3	GYTQQLAFR	542.28	322.19	2+	y2+	70.6	28.9
P01031	Complement	WLSEEQR	474.23	300.17	2+	b2+	65.7	25.9
P01031	Complement	WLSEEQR	474.23	648.29	2+	y5+	65.7	25.9
P01031	Complement	WLSEEQR	474.23	303.18	2+	y2+	65.7	25.9
P01031	Complement	VFQFLEK	455.76	247.14	2+	b2+	64.3	25.1
P01031	Complement	VFQFLEK	455.76	664.37	2+	y5+	64.3	25.1
P01031	Complement	VFQFLEK	455.76	536.31	2+	y4+	64.3	25.1
P01031	Complement	TDAPDLPEENQAR	728.34	613.28	2+	b6+	84.2	37
P01031	Complement	TDAPDLPEENQAR	728.34	1168.56	2+	y10+	84.2	37
P01031	Complement	TDAPDLPEENQAR	728.34	843.4	2+	y7+	84.2	37
P01031	Complement	GIYGTISR	433.74	171.11	2+	b2+	62.7	24.1
P01031	Complement	GIYGTISR	433.74	696.37	2+	y6+	62.7	24.1
P01031	Complement	GIYGTISR	433.74	533.3	2+	y5+	62.7	24.1
P01031	Complement	FSYSSGHVHLSSENK	560.27	235.11	3+	b2+	72	41.5
P01031	Complement	FSYSSGHVHLSSENK	560.27	766.32	3+	b7+	72	41.5
P01031	Complement	FSYSSGHVHLSSENK	560.27	261.16	3+	y2+	72	41.5
P01031	Complement	DINYVNPVIK	587.83	506.22	2+	b4+	74	30.9
P01031	Complement	DINYVNPVIK	587.83	669.43	2+	y6+	74	30.9
P01031	Complement	DINYVNPVIK	587.83	570.36	2+	y5+	74	30.9
P01042	Kininogen-1	YNSQNQSNNQFVLYR	937.94	1140.58	2+	y9+	99.5	46.3
P01042	Kininogen-1	YNSQNQSNNQFVLYR	937.94	697.4	2+	y5+	99.5	46.3
P01042	Kininogen-1	YNSQNQSNNQFVLYR	937.94	451.27	2+	y3+	99.5	46.3
P01042	Kininogen-1	YFIDFVAR	515.77	311.14	2+	b2+	68.7	27.7
P01042	Kininogen-1	YFIDFVAR	515.77	720.4	2+	y6+	68.7	27.7
P01042	Kininogen-1	YFIDFVAR	515.77	607.32	2+	y5+	68.7	27.7
P01042	Kininogen-1	TVGSDTFYSFK	626.3	201.12	2+	b2+	76.8	32.6
P01042	Kininogen-1	TVGSDTFYSFK	626.3	1051.47	2+	y9+	76.8	32.6
P01042	Kininogen-1	TVGSDTFYSFK	626.3	907.42	2+	y7+	76.8	32.6
P01042	Kininogen-1	QVVAGLNFR	502.29	677.37	2+	y6+	67.7	27.1
P01042	Kininogen-1	QVVAGLNFR	502.29	606.34	2+	y5+	67.7	27.1
P01042	Kininogen-1	QVVAGLNFR	502.29	436.23	2+	y3+	67.7	27.1
P01591	Immunoglobulin J chain	SSEDPNEDIVER	695.31	1086.51	2+	y9+	81.8	35.6
P01591	Immunoglobulin J chain	SSEDPNEDIVER	695.31	971.48	2+	y8+	81.8	35.6
P01591	Immunoglobulin J chain	SSEDPNEDIVER	695.31	403.23	2+	y3+	81.8	35.6
P01781	Ig heavy chain V-III region GAL	GLEWVANIK	515.29	730.42	2+	y6+	68.7	27.7
P01781	Ig heavy chain V-III region GAL	GLEWVANIK	515.29	544.35	2+	y5+	68.7	27.7
P01781	Ig heavy chain V-III region GAL	GLEWVANIK	515.29	445.28	2+	y4+	68.7	27.7
P01834	Ig kappa chain C region	TVAAPSVFIFPPSDEQLK	973.52	1060.53	2+	y9+	102.1	47.8
P01834	Ig kappa chain C region	TVAAPSVFIFPPSDEQLK	973.52	913.46	2+	y8+	102.1	47.8
P01857	Ig gamma-1 chain C region	GPSVFPLAPSSK	593.83	585.3	2+	b6+	74.4	31.1
P01857	Ig gamma-1 chain C region	GPSVFPLAPSSK	593.83	846.47	2+	y8+	74.4	31.1
P01857	Ig gamma-1 chain C region	GPSVFPLAPSSK	593.83	699.4	2+	y7+	74.4	31.1
P01861	Ig gamma-4 chain C region	TTPPVLDSDGSFFLYSR	951.47	1178.55	2+	y10+	100.5	46.9
P01861	Ig gamma-4 chain C region	TTPPVLDSDGSFFLYSR	951.47	976.49	2+	y8+	100.5	46.9
P01871	Ig mu chain C region	YAATSQVLLPSK	639.36	947.52	2+	b9+	77.7	33.1
P01871	Ig mu chain C region	YAATSQVLLPSK	639.36	444.28	2+	y4+	77.7	33.1
P01871	Ig mu chain C region	YAATSQVLLPSK	639.36	331.2	2+	y3+	77.7	33.1
P01871	Ig mu chain C region	QVGSGVTTDQVQAEAK	809.41	1090.54	2+	y10+	90.1	40.6
P01871	Ig mu chain C region	QVGSGVTTDQVQAEAK	809.41	989.49	2+	y9+	90.1	40.6
P01871	Ig mu chain C region	QVGSGVTTDQVQAEAK	809.41	888.44	2+	y8+	90.1	40.6
P01871	Ig mu chain C region	QIQVSWLR	515.3	788.44	2+	y6+	68.7	27.7
P01871	Ig mu chain C region	QIQVSWLR	515.3	660.38	2+	y5+	68.7	27.7
P01871	Ig mu chain C region	QIQVSWLR	515.3	561.31	2+	y4+	68.7	27.7
P01876	Ig alpha-1 chain C region	TPLTATLSK	466.28	733.45	2+	y7+	65.1	25.5
P01876	Ig alpha-1 chain C region	TPLTATLSK	466.28	620.36	2+	y6+	65.1	25.5
P01876	Ig alpha-1 chain C region	TPLTATLSK	466.28	448.28	2+	y4+	65.1	25.5
P01876	Ig alpha-1 chain C region	DASGVTFTWTPSSGK	770.87	1111.54	2+	y10+	87.3	38.9
P01876	Ig alpha-1 chain C region	DASGVTFTWTPSSGK	770.87	576.3	2+	y6+	87.3	38.9
P01876	Ig alpha-1 chain C region	DASGVTFTWTPSSGK	770.87	475.25	2+	y5+	87.3	38.9
P01877	Ig alpha-2 chain C region	DASGATFTWTPSSGK	756.85	863.43	2+	y8+	86.3	38.3
P01877	Ig alpha-2 chain C region	DASGATFTWTPSSGK	756.85	576.3	2+	y6+	86.3	38.3
P01877	Ig alpha-2 chain C region	DASGATFTWTPSSGK	756.85	475.25	2+	y5+	86.3	38.3
P02647	Apolipoprotein A-I	VSFLSALEEYTK	693.86	940.46	2+	y8+	81.7	35.5
P02647	Apolipoprotein A-I	VSFLSALEEYTK	693.86	782.39	2+	y6+	81.7	35.5
P02647	Apolipoprotein A-I	VSFLSALEEYTK	693.86	669.31	2+	y5+	81.7	35.5
P02647	Apolipoprotein A-I	THLAPYSDELR	651.33	1063.54	2+	y9+	78.6	33.7
P02647	Apolipoprotein A-I	THLAPYSDELR	651.33	950.46	2+	y8+	78.6	33.7
P02647	Apolipoprotein A-I	THLAPYSDELR	651.33	879.42	2+	y7+	78.6	33.7
P02647	Apolipoprotein A-I	QGLLPVLESFK	615.86	299.17	2+	b3+	76	32.1
P02647	Apolipoprotein A-I	QGLLPVLESFK	615.86	932.55	2+	y8+	76	32.1
P02647	Apolipoprotein A-I	QGLLPVLESFK	615.86	819.46	2+	y7+	76	32.1
P02647	Apolipoprotein A-I	LLDNWDSVTSTFSK	806.9	971.47	2+	y9+	89.9	40.5
P02647	Apolipoprotein A-I	LLDNWDSVTSTFSK	806.9	856.44	2+	y8+	89.9	40.5
P02647	Apolipoprotein A-I	LLDNWDSVTSTFSK	806.9	670.34	2+	y6+	89.9	40.5
P02647	Apolipoprotein A-I	DLATVYVDVLK	618.35	936.54	2+	y8+	76.2	32.2
P02647	Apolipoprotein A-I	DLATVYVDVLK	618.35	835.49	2+	y7+	76.2	32.2
P02647	Apolipoprotein A-I	DLATVYVDVLK	618.35	736.42	2+	y6+	76.2	32.2
P02649	Apolipoprotein E	WELALGR	422.74	316.13	2+	b2+	61.9	23.6
P02649	Apolipoprotein E	WELALGR	422.74	529.35	2+	y5+	61.9	23.6
P02649	Apolipoprotein E	WELALGR	422.74	416.26	2+	y4+	61.9	23.6
P02649	Apolipoprotein E	LQAEAFQAR	517.27	242.15	2+	b2+	68.8	27.8
P02649	Apolipoprotein E	LQAEAFQAR	517.27	792.4	2+	y7+	68.8	27.8
P02649	Apolipoprotein E	LQAEAFQAR	517.27	592.32	2+	y5+	68.8	27.8
P02649	Apolipoprotein E	LGPLVEQGR	484.78	381.25	2+	b4+	66.5	26.3
P02649	Apolipoprotein E	LGPLVEQGR	484.78	588.31	2+	y5+	66.5	26.3
P02649	Apolipoprotein E	LGPLVEQGR	484.78	360.2	2+	y3+	66.5	26.3
P02649	Apolipoprotein E	LAVYQAGAR	474.77	764.4	2+	y7+	65.7	25.9
P02649	Apolipoprotein E	LAVYQAGAR	474.77	665.34	2+	y6+	65.7	25.9
P02649	Apolipoprotein E	LAVYQAGAR	474.77	502.27	2+	y5+	65.7	25.9
P02649	Apolipoprotein E	AATVGSLAGQPLQER	749.4	856.45	2+	b10+	85.7	38
P02649	Apolipoprotein E	AATVGSLAGQPLQER	749.4	827.44	2+	y7+	85.7	38
P02649	Apolipoprotein E	AATVGSLAGQPLQER	749.4	642.36	2+	y5+	85.7	38
P02746	Complement C1q subcomponent subunit B	IAFSATR	383.22	185.13	2+	b2+	59.1	21.9
P02746	Complement C1q subcomponent subunit B	IAFSATR	383.22	581.3	2+	y5+	59.1	21.9
P02746	Complement C1q subcomponent subunit B	IAFSATR	383.22	434.24	2+	y4+	59.1	21.9
P02747	Complement C1q subcomponent subunit C	TNQVNSGGVLLR	629.35	914.54	2+	y9+	77	32.7
P02747	Complement C1q subcomponent subunit C	TNQVNSGGVLLR	629.35	815.47	2+	y8+	77	32.7
P02747	Complement C1q subcomponent subunit C	TNQVNSGGVLLR	629.35	401.29	2+	y3+	77	32.7
P02747	Complement C1q subcomponent subunit C	FQSVFTVTR	542.79	809.45	2+	y7+	70.7	28.9
P02747	Complement C1q subcomponent subunit C	FQSVFTVTR	542.79	623.35	2+	y5+	70.7	28.9
P02747	Complement C1q subcomponent subunit C	FQSVFTVTR	542.79	276.17	2+	y2+	70.7	28.9
P02748	Complement component C9	TSNFNAAISLK	583.31	863.5	2+	y8+	73.6	30.7
P02748	Complement component C9	TSNFNAAISLK	583.31	716.43	2+	y7+	73.6	30.7
P02748	Complement component C9	TSNFNAAISLK	583.31	347.23	2+	y3+	73.6	30.7
P02748	Complement component C9	TEHYEEQIEAFK	762.35	1156.55	2+	y9+	86.7	38.5
P02748	Complement component C9	TEHYEEQIEAFK	762.35	993.49	2+	y8+	86.7	38.5
P02748	Complement component C9	TEHYEEQIEAFK	762.35	735.4	2+	y6+	86.7	38.5
P02748	Complement component C9	LSPIYNLVPVK	621.88	900.52	2+	b8+	76.5	32.4
P02748	Complement component C9	LSPIYNLVPVK	621.88	442.3	2+	y4+	76.5	32.4
P02748	Complement component C9	LSPIYNLVPVK	621.88	343.23	2+	y3+	76.5	32.4
P02748	Complement component C9	AIEDYINEFSVR	728.36	864.46	2+	y7+	84.2	37
P02748	Complement component C9	AIEDYINEFSVR	728.36	751.37	2+	y6+	84.2	37
P02748	Complement component C9	AIEDYINEFSVR	728.36	508.29	2+	y4+	84.2	37
P02749	Beta-2-glycoprotein 1	EHSSLAFWK	552.78	267.11	2+	b2+	71.4	29.3
P02749	Beta-2-glycoprotein 1	EHSSLAFWK	552.78	838.45	2+	y7+	71.4	29.3
P02749	Beta-2-glycoprotein 1	EHSSLAFWK	552.78	333.19	2+	y2+	71.4	29.3
P02749	Beta-2-glycoprotein 1	ATVVYQGER	511.77	751.37	2+	y6+	68.4	27.5
P02749	Beta-2-glycoprotein 1	ATVVYQGER	511.77	652.3	2+	y5+	68.4	27.5
P02749	Beta-2-glycoprotein 1	ATVVYQGER	511.77	489.24	2+	y4+	68.4	27.5
P02750	Leucine-rich alpha-2-glycoprotein	VAAGAFQGLR	495.28	819.45	2+	y8+	67.2	26.8
P02750	Leucine-rich alpha-2-glycoprotein	VAAGAFQGLR	495.28	748.41	2+	y7+	67.2	26.8
P02750	Leucine-rich alpha-2-glycoprotein	VAAGAFQGLR	495.28	620.35	2+	y5+	67.2	26.8
P02750	Leucine-rich alpha-2-glycoprotein	TLDLGENQLETLPPDLLR	1019.05	924.55	2+	y8+	105.4	49.8
P02750	Leucine-rich alpha-2-glycoprotein	TLDLGENQLETLPPDLLR	1019.05	710.42	2+	y6+	105.4	49.8
P02750	Leucine-rich alpha-2-glycoprotein	DLLLPQPDLR	590.34	342.2	2+	b3+	74.2	31
P02750	Leucine-rich alpha-2-glycoprotein	DLLLPQPDLR	590.34	455.29	2+	b4+	74.2	31
P02750	Leucine-rich alpha-2-glycoprotein	DLLLPQPDLR	590.34	725.39	2+	y6+	74.2	31
P02750	Leucine-rich alpha-2-glycoprotein	ALGHLDLSGNR	576.81	774.41	2+	y7+	73.2	30.4
P02750	Leucine-rich alpha-2-glycoprotein	ALGHLDLSGNR	576.81	661.33	2+	y6+	73.2	30.4
P02750	Leucine-rich alpha-2-glycoprotein	ALGHLDLSGNR	576.81	546.3	2+	y5+	73.2	30.4
P02751	Fibronectin OS=Homo sapiens	SYTITGLQPGTDYK	772.39	864.45	2+	b8+	87.4	39
P02751	Fibronectin OS=Homo sapiens	SYTITGLQPGTDYK	772.39	978.49	2+	y9+	87.4	39
P02751	Fibronectin OS=Homo sapiens	SYTITGLQPGTDYK	772.39	680.32	2+	y6+	87.4	39
P02751	Fibronectin OS=Homo sapiens	LTVGLTR	380.24	371.23	2+	b4+	58.8	21.7
P02751	Fibronectin OS=Homo sapiens	LTVGLTR	380.24	545.34	2+	y5+	58.8	21.7
P02751	Fibronectin OS=Homo sapiens	LTVGLTR	380.24	446.27	2+	y4+	58.8	21.7
P02751	Fibronectin OS=Homo sapiens	IYLYTLNDNAR	678.35	1079.55	2+	y9+	80.6	34.8
P02751	Fibronectin OS=Homo sapiens	IYLYTLNDNAR	678.35	966.46	2+	y8+	80.6	34.8
P02751	Fibronectin OS=Homo sapiens	IYLYTLNDNAR	678.35	803.4	2+	y7+	80.6	34.8
P02751	Fibronectin OS=Homo sapiens	IGDTWR	374.19	634.29	2+	y5+	58.4	21.5
P02751	Fibronectin OS=Homo sapiens	IGDTWR	374.19	577.27	2+	y4+	58.4	21.5
P02751	Fibronectin OS=Homo sapiens	IGDTWR	374.19	462.25	2+	y3+	58.4	21.5
P02751	Fibronectin OS=Homo sapiens	FLATTPNSLLVSWQPPR	964.03	770.39	2+	y6+	101.4	47.4
P02751	Fibronectin OS=Homo sapiens	FLATTPNSLLVSWQPPR	964.03	369.22	2+	y3+	101.4	47.4
P02760	Protein AMBP	AFIQLWAFDAVK	704.88	836.43	2+	y7+	82.5	36
P02760	Protein AMBP	AFIQLWAFDAVK	704.88	650.35	2+	y6+	82.5	36
P02763	Alpha-1-acid glycoprotein 1	YVGGQEHFAHLLILR	584.99	263.14	3+	b2+	73.8	42.9
P02763	Alpha-1-acid glycoprotein 1	YVGGQEHFAHLLILR	584.99	627.46	3+	y5+	73.8	42.9
P02763	Alpha-1-acid glycoprotein 1	YVGGQEHFAHLLILR	584.99	514.37	3+	y4+	73.8	42.9
P02763	Alpha-1-acid glycoprotein 1	SDVVYTDWK	556.77	401.2	2+	b4+	71.7	29.5
P02763	Alpha-1-acid glycoprotein 1	SDVVYTDWK	556.77	811.4	2+	y6+	71.7	29.5
P02763	Alpha-1-acid glycoprotein 1	SDVVYTDWK	556.77	712.33	2+	y5+	71.7	29.5
P02765	Alpha-2-HS-glycoprotein	FSVVYAK	407.23	235.11	2+	b2+	60.8	22.9
P02765	Alpha-2-HS-glycoprotein	FSVVYAK	407.23	579.35	2+	y5+	60.8	22.9
P02765	Alpha-2-HS-glycoprotein	FSVVYAK	407.23	480.28	2+	y4+	60.8	22.9
P02768	Serum albumin	YLYEIAR	464.25	277.15	2+	b2+	65	25.4
P02768	Serum albumin	YLYEIAR	464.25	651.35	2+	y5+	65	25.4
P02768	Serum albumin	YLYEIAR	464.25	488.28	2+	y4+	65	25.4
P02768	Serum albumin	VFDEFKPLVEEPQNLIK	682.37	970.52	3+	y8+	80.9	48.6
P02768	Serum albumin	VFDEFKPLVEEPQNLIK	682.37	841.48	3+	y7+	80.9	48.6
P02768	Serum albumin	VFDEFKPLVEEPQNLIK	682.37	712.44	3+	y6+	80.9	48.6
P02768	Serum albumin	QTALVELVK	500.81	771.5	2+	y7+	67.6	27
P02768	Serum albumin	QTALVELVK	500.81	587.38	2+	y5+	67.6	27
P02768	Serum albumin	QTALVELVK	500.81	488.31	2+	y4+	67.6	27
P02768	Serum albumin	LVNEVTEFAK	575.31	937.46	2+	y8+	73.1	30.3
P02768	Serum albumin	LVNEVTEFAK	575.31	694.38	2+	y6+	73.1	30.3
P02768	Serum albumin	LVNEVTEFAK	575.31	595.31	2+	y5+	73.1	30.3
P02768	Serum albumin	FQNALLVR	480.78	276.13	2+	b2+	66.2	26.2
P02768	Serum albumin	FQNALLVR	480.78	685.44	2+	y6+	66.2	26.2
P02768	Serum albumin	FQNALLVR	480.78	500.36	2+	y4+	66.2	26.2
P02774	Vitamin D-binding protein	HLSLLTTLSNR	627.86	251.15	2+	b2+	76.9	32.6
P02774	Vitamin D-binding protein	HLSLLTTLSNR	627.86	1004.57	2+	y9+	76.9	32.6
P02774	Vitamin D-binding protein	HLSLLTTLSNR	627.86	691.37	2+	y6+	76.9	32.6
P02787	Serotransferrin	SASDLTWDNLK	625.31	776.39	2+	y6+	76.7	32.5
P02787	Serotransferrin	SASDLTWDNLK	625.31	675.35	2+	y5+	76.7	32.5
P02787	Serotransferrin	SASDLTWDNLK	625.31	489.27	2+	y4+	76.7	32.5
P02787	Serotransferrin	HSTIFENLANK	425.22	439.23	3+	b4+	62.1	33.7
P02787	Serotransferrin	HSTIFENLANK	425.22	559.32	3+	y5+	62.1	33.7
P02787	Serotransferrin	HSTIFENLANK	425.22	332.19	3+	y3+	62.1	33.7
P02787	Serotransferrin	EGYYGYTGAFR	642.29	771.38	2+	y7+	77.9	33.3
P02787	Serotransferrin	EGYYGYTGAFR	642.29	551.29	2+	y5+	77.9	33.3
P02787	Serotransferrin	EGYYGYTGAFR	642.29	450.25	2+	y4+	77.9	33.3
P02787	Serotransferrin	EFQLFSSPHGK	638.82	872.46	2+	y8+	77.7	33.1
P02787	Serotransferrin	EFQLFSSPHGK	638.82	759.38	2+	y7+	77.7	33.1
P02787	Serotransferrin	EFQLFSSPHGK	638.82	612.31	2+	y6+	77.7	33.1
P02787	Serotransferrin	EDPQTFYYAVAVVK	815.41	1059.59	2+	y9+	90.6	40.9
P02787	Serotransferrin	EDPQTFYYAVAVVK	815.41	912.52	2+	y8+	90.6	40.9
P02787	Serotransferrin	EDPQTFYYAVAVVK	815.41	749.46	2+	y7+	90.6	40.9
P02787	Serotransferrin	DGAGDVAFVK	489.75	586.25	2+	b7+	66.8	26.5
P02787	Serotransferrin	DGAGDVAFVK	489.75	735.4	2+	y7+	66.8	26.5
P02787	Serotransferrin	DGAGDVAFVK	489.75	464.29	2+	y4+	66.8	26.5
P02790	Hemopexin	NFPSPVDAAFR	610.81	262.12	2+	b2+	75.6	31.9
P02790	Hemopexin	NFPSPVDAAFR	610.81	959.49	2+	y9+	75.6	31.9
P02790	Hemopexin	NFPSPVDAAFR	610.81	775.41	2+	y7+	75.6	31.9
P02790	Hemopexin	GGYTLVSGYPK	571.3	898.43	2+	b9+	72.8	30.1
P02790	Hemopexin	GGYTLVSGYPK	571.3	650.35	2+	y6+	72.8	30.1
P02790	Hemopexin	GGYTLVSGYPK	571.3	551.28	2+	y5+	72.8	30.1
P03952	Plasma kallikrein	IAYGTQGSSGYSLR	730.36	1112.53	2+	y11+	84.4	37.1
P03952	Plasma kallikrein	IAYGTQGSSGYSLR	730.36	954.46	2+	y9+	84.4	37.1
P03952	Plasma kallikrein	IAYGTQGSSGYSLR	730.36	826.41	2+	y8+	84.4	37.1
P04003	C4b-binding protein alpha chain	LSLEIEQLELQR	735.91	915.49	2+	y7+	84.8	37.4
P04003	C4b-binding protein alpha chain	LSLEIEQLELQR	735.91	545.3	2+	y4+	84.8	37.4
P04003	C4b-binding protein alpha chain	LSLEIEQLELQR	735.91	416.26	2+	y3+	84.8	37.4
P04003	C4b-binding protein alpha chain	EDVYVVGTVLR	625.34	606.28	2+	b5+	76.7	32.5
P04003	C4b-binding protein alpha chain	EDVYVVGTVLR	625.34	644.41	2+	y6+	76.7	32.5
P04003	C4b-binding protein alpha chain	EDVYVVGTVLR	625.34	545.34	2+	y5+	76.7	32.5
P04004	Vitronectin	FEDGVLDPDYPR	711.83	875.43	2+	y7+	83	36.3
P04004	Vitronectin	FEDGVLDPDYPR	711.83	762.34	2+	y6+	83	36.3
P04004	Vitronectin	FEDGVLDPDYPR	711.83	647.31	2+	y5+	83	36.3
P04004	Vitronectin	DVWGIEGPIDAAFTR	823.91	1076.54	2+	y10+	91.2	41.3
P04004	Vitronectin	DVWGIEGPIDAAFTR	823.91	947.49	2+	y9+	91.2	41.3
P04004	Vitronectin	DVWGIEGPIDAAFTR	823.91	890.47	2+	y8+	91.2	41.3
P04114	Apolipoprotein B-100	TGISPLALIK	506.82	854.57	2+	y8+	68.1	27.3
P04114	Apolipoprotein B-100	TGISPLALIK	506.82	741.49	2+	y7+	68.1	27.3
P04114	Apolipoprotein B-100	TGISPLALIK	506.82	654.45	2+	y6+	68.1	27.3
P04114	Apolipoprotein B-100	SVSDGIAALDLNAVANK	829.44	1099.61	2+	y11+	91.6	41.5
P04114	Apolipoprotein B-100	SVSDGIAALDLNAVANK	829.44	957.54	2+	y9+	91.6	41.5
P04114	Apolipoprotein B-100	SVSDGIAALDLNAVANK	829.44	844.45	2+	y8+	91.6	41.5
P04114	Apolipoprotein B-100	NNALDFVTK	511.27	793.45	2+	y7+	68.4	27.5
P04114	Apolipoprotein B-100	NNALDFVTK	511.27	722.41	2+	y6+	68.4	27.5
P04114	Apolipoprotein B-100	NNALDFVTK	511.27	494.3	2+	y4+	68.4	27.5
P04114	Apolipoprotein B-100	GFEPTLEALFGK	654.85	958.49	2+	b9+	78.9	33.8
P04114	Apolipoprotein B-100	GFEPTLEALFGK	654.85	1105.56	2+	b10+	78.9	33.8
P04114	Apolipoprotein B-100	GFEPTLEALFGK	654.85	975.55	2+	y9+	78.9	33.8
P04114	Apolipoprotein B-100	FSVPAGIVIPSFQALTAR	937.53	771.44	2+	b8+	99.5	46.3
P04114	Apolipoprotein B-100	FSVPAGIVIPSFQALTAR	937.53	1202.69	2+	y11+	99.5	46.3
P04114	Apolipoprotein B-100	FSVPAGIVIPSFQALTAR	937.53	990.54	2+	y9+	99.5	46.3
P04180	Phosphatidylcholine-sterol acyltransferase	SSGLVSNAPGVQIR	692.88	941.52	2+	y9+	81.6	35.5
P04180	Phosphatidylcholine-sterol acyltransferase	SSGLVSNAPGVQIR	692.88	669.4	2+	y6+	81.6	35.5
P04180	Phosphatidylcholine-sterol acyltransferase	SSGLVSNAPGVQIR	692.88	416.26	2+	y3+	81.6	35.5
P04196	Histidine-rich glycoprotein	DSPVLIDFFEDTER	841.9	625.36	2+	b6+	92.5	42
P04196	Histidine-rich glycoprotein	DSPVLIDFFEDTER	841.9	1171.53	2+	y9+	92.5	42
P04196	Histidine-rich glycoprotein	DSPVLIDFFEDTER	841.9	1058.44	2+	y8+	92.5	42
P04196	Histidine-rich glycoprotein	DGYLFQLLR	562.81	336.12	2+	b3+	72.1	29.8
P04196	Histidine-rich glycoprotein	DGYLFQLLR	562.81	789.5	2+	y6+	72.1	29.8
P04196	Histidine-rich glycoprotein	DGYLFQLLR	562.81	676.41	2+	y5+	72.1	29.8
P04217	Alpha-1B-glycoprotein	TPGAAANLELIFVGPQHAGNYR	766.07	999.48	3+	y9+	87	53.4
P04217	Alpha-1B-glycoprotein	TPGAAANLELIFVGPQHAGNYR	766.07	942.45	3+	y8+	87	53.4
P04217	Alpha-1B-glycoprotein	SGLSTGWTQLSK	632.83	1007.52	2+	y9+	77.3	32.8
P04217	Alpha-1B-glycoprotein	SGLSTGWTQLSK	632.83	920.48	2+	y8+	77.3	32.8
P04217	Alpha-1B-glycoprotein	SGLSTGWTQLSK	632.83	819.44	2+	y7+	77.3	32.8
P04217	Alpha-1B-glycoprotein	LLELTGPK	435.77	227.18	2+	b2+	62.9	24.2
P04217	Alpha-1B-glycoprotein	LLELTGPK	435.77	644.36	2+	y6+	62.9	24.2
P04217	Alpha-1B-glycoprotein	LLELTGPK	435.77	515.32	2+	y5+	62.9	24.2
P04217	Alpha-1B-glycoprotein	HQFLLTGDTQGR	686.85	1107.58	2+	y10+	81.2	35.2
P04217	Alpha-1B-glycoprotein	HQFLLTGDTQGR	686.85	847.43	2+	y8+	81.2	35.2
P04217	Alpha-1B-glycoprotein	HQFLLTGDTQGR	686.85	734.34	2+	y7+	81.2	35.2
P04217	Alpha-1B-glycoprotein	GVTFLLR	403.25	518.3	2+	b5+	60.5	22.7
P04217	Alpha-1B-glycoprotein	GVTFLLR	403.25	649.4	2+	y5+	60.5	22.7
P04217	Alpha-1B-glycoprotein	GVTFLLR	403.25	288.2	2+	y2+	60.5	22.7
P04217	Alpha-1B-glycoprotein	ATWSGAVLAGR	544.8	730.42	2+	y8+	70.8	29
P04217	Alpha-1B-glycoprotein	ATWSGAVLAGR	544.8	416.26	2+	y4+	70.8	29
P04217	Alpha-1B-glycoprotein	ATWSGAVLAGR	544.8	303.18	2+	y3+	70.8	29
P05090	Apolipoprotein D	NILTSNNIDVK	615.84	1003.54	2+	y9+	76	32.1
P05090	Apolipoprotein D	NILTSNNIDVK	615.84	890.46	2+	y8+	76	32.1
P05090	Apolipoprotein D	NILTSNNIDVK	615.84	789.41	2+	y7+	76	32.1
P05155	Plasma protease C1 inhibitor	TNLESILSYPK	632.84	936.5	2+	y8+	77.3	32.8
P05155	Plasma protease C1 inhibitor	TNLESILSYPK	632.84	807.46	2+	y7+	77.3	32.8
P05155	Plasma protease C1 inhibitor	TNLESILSYPK	632.84	407.23	2+	y3+	77.3	32.8
P05155	Plasma protease C1 inhibitor	LLDSLPSDTR	558.8	542.32	2+	b5+	71.9	29.6
P05155	Plasma protease C1 inhibitor	LLDSLPSDTR	558.8	890.42	2+	y8+	71.9	29.6
P05155	Plasma protease C1 inhibitor	LLDSLPSDTR	558.8	575.28	2+	y5+	71.9	29.6
P05155	Plasma protease C1 inhibitor	GVTSVSQIFHSPDLAIR	913.99	1056.55	2+	b10+	97.7	45.2
P05155	Plasma protease C1 inhibitor	GVTSVSQIFHSPDLAIR	913.99	1055.56	2+	y9+	97.7	45.2
P05155	Plasma protease C1 inhibitor	GVTSVSQIFHSPDLAIR	913.99	771.44	2+	y7+	97.7	45.2
P05156	Complement factor I	VFSLQWGEVK	596.82	947.46	2+	b8+	74.6	31.3
P05156	Complement factor I	VFSLQWGEVK	596.82	946.5	2+	y8+	74.6	31.3
P05156	Complement factor I	VFSLQWGEVK	596.82	618.32	2+	y5+	74.6	31.3
P05156	Complement factor I	IVIEYVDR	503.78	213.16	2+	b2+	67.8	27.2
P05156	Complement factor I	IVIEYVDR	503.78	794.4	2+	y6+	67.8	27.2
P05156	Complement factor I	IVIEYVDR	503.78	681.32	2+	y5+	67.8	27.2
P05156	Complement factor I	AQLGDLPWQVAIK	719.91	598.32	2+	b6+	83.6	36.7
P05156	Complement factor I	AQLGDLPWQVAIK	719.91	954.58	2+	y8+	83.6	36.7
P05156	Complement factor I	AQLGDLPWQVAIK	719.91	841.49	2+	y7+	83.6	36.7
P05543	Thyroxine-binding globulin	NALALFVLPK	543.34	842.51	2+	b8+	70.7	28.9
P05543	Thyroxine-binding globulin	NALALFVLPK	543.34	787.51	2+	y7+	70.7	28.9
P05543	Thyroxine-binding globulin	NALALFVLPK	543.34	357.25	2+	y3+	70.7	28.9
P05543	Thyroxine-binding globulin	GWVDLFVPK	530.79	817.48	2+	y7+	69.8	28.4
P05543	Thyroxine-binding globulin	GWVDLFVPK	530.79	718.41	2+	y6+	69.8	28.4
P05543	Thyroxine-binding globulin	GWVDLFVPK	530.79	244.17	2+	y2+	69.8	28.4
P05546	Heparin cofactor 2	TLEAQLTPR	514.79	814.44	2+	y7+	68.6	27.7
P05546	Heparin cofactor 2	TLEAQLTPR	514.79	373.22	2+	y3+	68.6	27.7
P05546	Heparin cofactor 2	TLEAQLTPR	514.79	272.17	2+	y2+	68.6	27.7
P05546	Heparin cofactor 2	SVNDLYIQK	540.29	529.26	2+	b5+	70.5	28.8
P05546	Heparin cofactor 2	SVNDLYIQK	540.29	893.47	2+	y7+	70.5	28.8
P05546	Heparin cofactor 2	SVNDLYIQK	540.29	551.32	2+	y4+	70.5	28.8
P05546	Heparin cofactor 2	QFPILLDFK	560.82	845.51	2+	y7+	72	29.7
P05546	Heparin cofactor 2	QFPILLDFK	560.82	409.21	2+	y3+	72	29.7
P05546	Heparin cofactor 2	QFPILLDFK	560.82	294.18	2+	y2+	72	29.7
P05546	Heparin cofactor 2	NYNLVESLK	540.29	278.11	2+	b2+	70.5	28.8
P05546	Heparin cofactor 2	NYNLVESLK	540.29	802.47	2+	y7+	70.5	28.8
P05546	Heparin cofactor 2	NYNLVESLK	540.29	575.34	2+	y5+	70.5	28.8
P05546	Heparin cofactor 2	NFGYTLR	435.73	262.12	2+	b2+	62.9	24.2
P05546	Heparin cofactor 2	NFGYTLR	435.73	609.34	2+	y5+	62.9	24.2
P05546	Heparin cofactor 2	NFGYTLR	435.73	389.25	2+	y3+	62.9	24.2
P06396	Gelsolin	HVVPNEVVVQR	638.36	237.13	2+	b2+	77.7	33.1
P06396	Gelsolin	HVVPNEVVVQR	638.36	1039.59	2+	y9+	77.7	33.1
P06396	Gelsolin	HVVPNEVVVQR	638.36	940.52	2+	y8+	77.7	33.1
P06396	Gelsolin	EVQGFESATFLGYFK	861.92	1162.58	2+	y10+	94	42.9
P06396	Gelsolin	EVQGFESATFLGYFK	861.92	1033.54	2+	y9+	94	42.9
P06396	Gelsolin	AGALNSNDAFVLK	660.35	1007.52	2+	y9+	79.3	34.1
P06396	Gelsolin	AGALNSNDAFVLK	660.35	893.47	2+	y8+	79.3	34.1
P06396	Gelsolin	AGALNSNDAFVLK	660.35	806.44	2+	y7+	79.3	34.1
P06681	Complement C2	SSGQWQTPGATR	638.31	730.38	2+	y7+	77.6	33.1
P06681	Complement C2	SSGQWQTPGATR	638.31	602.33	2+	y6+	77.6	33.1
P06681	Complement C2	SSGQWQTPGATR	638.31	501.28	2+	y5+	77.6	33.1
P06681	Complement C2	HAIILLTDGK	540.82	209.1	2+	b2+	70.5	28.8
P06681	Complement C2	HAIILLTDGK	540.82	872.55	2+	y8+	70.5	28.8
P06681	Complement C2	HAIILLTDGK	540.82	759.46	2+	y7+	70.5	28.8
P06681	Complement C2	AVISPGFDVFAK	625.84	1080.57	2+	y10+	76.7	32.5
P06681	Complement C2	AVISPGFDVFAK	625.84	967.49	2+	y9+	76.7	32.5
P06681	Complement C2	AVISPGFDVFAK	625.84	880.46	2+	y8+	76.7	32.5
P07225	Vitamin K-dependent protein S	VYFAGFPR	478.75	263.14	2+	b2+	66	26.1
P07225	Vitamin K-dependent protein S	VYFAGFPR	478.75	694.37	2+	y6+	66	26.1
P07225	Vitamin K-dependent protein S	VYFAGFPR	478.75	547.3	2+	y5+	66	26.1
P07225	Vitamin K-dependent protein S	SFQTGLFTAAR	599.81	836.46	2+	y8+	74.8	31.4
P07225	Vitamin K-dependent protein S	SFQTGLFTAAR	599.81	735.41	2+	y7+	74.8	31.4
P07225	Vitamin K-dependent protein S	SFQTGLFTAAR	599.81	565.31	2+	y5+	74.8	31.4
P07360	Complement component C8 gamma chain	SLPVSDSVLSGFEQR	810.92	836.43	2+	y7+	90.2	40.7
P07360	Complement component C8 gamma chain	SLPVSDSVLSGFEQR	810.92	723.34	2+	y6+	90.2	40.7
P07360	Complement component C8 gamma chain	SLPVSDSVLSGFEQR	810.92	636.31	2+	y5+	90.2	40.7
P07360	Complement component C8 gamma chain	QLYGDTGVLGR	589.81	937.47	2+	y9+	74.1	31
P07360	Complement component C8 gamma chain	QLYGDTGVLGR	589.81	774.41	2+	y8+	74.1	31
P07360	Complement component C8 gamma chain	QLYGDTGVLGR	589.81	345.22	2+	y3+	74.1	31
P07996	Thrombospondin-1	FTGSQPFGQGVEHATANK	625.97	249.12	3+	b2+	76.8	45.3
P07996	Thrombospondin-1	FTGSQPFGQGVEHATANK	625.97	521.24	3+	b5+	76.8	45.3
P07996	Thrombospondin-1	FTGSQPFGQGVEHATANK	625.97	504.28	3+	y5+	76.8	45.3
P07996	Thrombospondin-1	FVFGTTPEDILR	697.87	1148.59	2+	y10+	82	35.7
P07996	Thrombospondin-1	FVFGTTPEDILR	697.87	843.46	2+	y7+	82	35.7
P07996	Thrombospondin-1	FVFGTTPEDILR	697.87	742.41	2+	y6+	82	35.7
P08185	Corticosteroid-binding globulin	WSAGLTSSQVDLYIPK	882.96	1149.62	2+	y10+	95.5	43.9
P08185	Corticosteroid-binding globulin	WSAGLTSSQVDLYIPK	882.96	1062.58	2+	y9+	95.5	43.9
P08603	Complement factor H	SSNLIILEEHLK	698.4	994.59	2+	y8+	82	35.7
P08603	Complement factor H	SSNLIILEEHLK	698.4	881.51	2+	y7+	82	35.7
P08603	Complement factor H	SSNLIILEEHLK	698.4	768.43	2+	y6+	82	35.7
P08603	Complement factor H	IDVHLVPDR	355.2	229.12	3+	b2+	57	29.6
P08603	Complement factor H	IDVHLVPDR	355.2	486.27	3+	y4+	57	29.6
P08603	Complement factor H	IDVHLVPDR	355.2	387.2	3+	y3+	57	29.6
P08697	Alpha-2-antiplasmin	LFGPDLK	395.23	261.16	2+	b2+	59.9	22.4
P08697	Alpha-2-antiplasmin	LFGPDLK	395.23	530.26	2+	b5+	59.9	22.4
P08697	Alpha-2-antiplasmin	LFGPDLK	395.23	529.3	2+	y5+	59.9	22.4
P09172	Dopamine beta-hydroxylase	HVLAAWALGAK	568.83	237.13	2+	b2+	72.6	30
P09172	Dopamine beta-hydroxylase	HVLAAWALGAK	568.83	900.53	2+	y9+	72.6	30
P09172	Dopamine beta-hydroxylase	HVLAAWALGAK	568.83	787.45	2+	y8+	72.6	30
P09871	Complement C1s subcomponent	TNFDNDIALVR	639.33	1062.56	2+	y9+	77.7	33.1
P09871	Complement C1s subcomponent	TNFDNDIALVR	639.33	915.49	2+	y8+	77.7	33.1
P09871	Complement C1s subcomponent	TNFDNDIALVR	639.33	458.31	2+	y4+	77.7	33.1
P09871	Complement C1s subcomponent	SSNNPHSPIVEEFQVPYNK	729.36	637.27	3+	b6+	84.3	51.3
P09871	Complement C1s subcomponent	SSNNPHSPIVEEFQVPYNK	729.36	620.34	3+	y5+	84.3	51.3
P09871	Complement C1s subcomponent	SSNNPHSPIVEEFQVPYNK	729.36	521.27	3+	y4+	84.3	51.3
P09871	Complement C1s subcomponent	SNALDIIFQTDLTGQK	882.46	1150.61	2+	y10+	95.4	43.8
P09871	Complement C1s subcomponent	SNALDIIFQTDLTGQK	882.46	1037.53	2+	y9+	95.4	43.8
P09871	Complement C1s subcomponent	SNALDIIFQTDLTGQK	882.46	762.4	2+	y7+	95.4	43.8
P09871	Complement C1s subcomponent	LQVIFK	374.24	242.15	2+	b2+	58.4	21.5
P09871	Complement C1s subcomponent	LQVIFK	374.24	506.33	2+	y4+	58.4	21.5
P09871	Complement C1s subcomponent	LQVIFK	374.24	407.27	2+	y3+	58.4	21.5
P0C0L5	Complement C4-B	DSSTWLTAFVLK	684.36	791.5	2+	y7+	81	35.1
P0C0L5	Complement C4-B	DSSTWLTAFVLK	684.36	577.37	2+	y5+	81	35.1
P0C0L5	Complement C4-B	DSSTWLTAFVLK	684.36	506.33	2+	y4+	81	35.1
P10643	Complement component C7	YSAWAESVTNLPQVIK	903.48	1222.57	2+	b11+	97	44.8
P10643	Complement component C7	YSAWAESVTNLPQVIK	903.48	697.46	2+	y6+	97	44.8
P10643	Complement component C7	YSAWAESVTNLPQVIK	903.48	584.38	2+	y5+	97	44.8
P10643	Complement component C7	SSGWHFVVK	523.77	900.44	2+	b8+	69.3	28
P10643	Complement component C7	SSGWHFVVK	523.77	872.48	2+	y7+	69.3	28
P10643	Complement component C7	SSGWHFVVK	523.77	629.38	2+	y5+	69.3	28
P10643	Complement component C7	LSGNVLSYTFQVK	728.4	985.54	2+	y8+	84.2	37
P10643	Complement component C7	LSGNVLSYTFQVK	728.4	872.45	2+	y7+	84.2	37
P10643	Complement component C7	LSGNVLSYTFQVK	728.4	785.42	2+	y6+	84.2	37
P10909	Clusterin OS=Homo sapiens	LFDSDPITVTVPVEVSR	937.5	886.5	2+	y8+	99.5	46.2
P10909	Clusterin OS=Homo sapiens	LFDSDPITVTVPVEVSR	937.5	686.38	2+	y6+	99.5	46.2
P10909	Clusterin OS=Homo sapiens	ASSIIDELFQDR	697.35	1035.51	2+	y8+	82	35.7
P10909	Clusterin OS=Homo sapiens	ASSIIDELFQDR	697.35	922.43	2+	y7+	82	35.7
P10909	Clusterin OS=Homo sapiens	ASSIIDELFQDR	697.35	565.27	2+	y4+	82	35.7
P12259	Coagulation factor V	EFNPLVIVGLSK	658.38	925.61	2+	y9+	79.1	34
P12259	Coagulation factor V	EFNPLVIVGLSK	658.38	616.4	2+	y6+	79.1	34
P12259	Coagulation factor V	EFNPLVIVGLSK	658.38	503.32	2+	y5+	79.1	34
P13671	Complement component C6	DLHLSDVFLK	593.83	479.26	2+	b4+	74.4	31.1
P13671	Complement component C6	DLHLSDVFLK	593.83	821.48	2+	y7+	74.4	31.1
P13671	Complement component C6	DLHLSDVFLK	593.83	708.39	2+	y6+	74.4	31.1
P15169	Carboxypeptidase N catalytic chain	IVQLIQDTR	543.32	873.48	2+	y7+	70.7	28.9
P15169	Carboxypeptidase N catalytic chain	IVQLIQDTR	543.32	745.42	2+	y6+	70.7	28.9
P15169	Carboxypeptidase N catalytic chain	IVQLIQDTR	543.32	519.25	2+	y4+	70.7	28.9
P19652	Alpha-1-acid glycoprotein 2	EHVAHLLFLR	617.86	968.6	2+	y8+	76.2	32.2
P19652	Alpha-1-acid glycoprotein 2	EHVAHLLFLR	617.86	869.54	2+	y7+	76.2	32.2
P19652	Alpha-1-acid glycoprotein 2	EHVAHLLFLR	617.86	798.5	2+	y6+	76.2	32.2
P19823	Inter-alpha-trypsin inhibitor heavy chain H2	VVNNSPQPQNVVFDVQIPK	1061.57	945.54	2+	y8+	108.5	51.7
P19823	Inter-alpha-trypsin inhibitor heavy chain H2	VVNNSPQPQNVVFDVQIPK	1061.57	846.47	2+	y7+	108.5	51.7
P19823	Inter-alpha-trypsin inhibitor heavy chain H2	VQFELHYQEVK	710.37	1192.6	2+	y9+	82.9	36.3
P19823	Inter-alpha-trypsin inhibitor heavy chain H2	VQFELHYQEVK	710.37	1045.53	2+	y8+	82.9	36.3
P19823	Inter-alpha-trypsin inhibitor heavy chain H2	VQFELHYQEVK	710.37	803.4	2+	y6+	82.9	36.3
P19823	Inter-alpha-trypsin inhibitor heavy chain H2	IYGNQDTSSQLK	677.34	1077.52	2+	y10+	80.5	34.8
P19823	Inter-alpha-trypsin inhibitor heavy chain H2	IYGNQDTSSQLK	677.34	778.39	2+	y7+	80.5	34.8
P19823	Inter-alpha-trypsin inhibitor heavy chain H2	IYGNQDTSSQLK	677.34	663.37	2+	y6+	80.5	34.8
P19823	Inter-alpha-trypsin inhibitor heavy chain H2	FYNQVSTPLLR	669.36	652.31	2+	b5+	79.9	34.5
P19823	Inter-alpha-trypsin inhibitor heavy chain H2	FYNQVSTPLLR	669.36	686.42	2+	y6+	79.9	34.5
P19823	Inter-alpha-trypsin inhibitor heavy chain H2	FYNQVSTPLLR	669.36	498.34	2+	y4+	79.9	34.5
P19827	Inter-alpha-trypsin inhibitor heavy chain H1	LDAQASFLPK	545.3	861.48	2+	y8+	70.9	29
P19827	Inter-alpha-trypsin inhibitor heavy chain H1	LDAQASFLPK	545.3	662.39	2+	y6+	70.9	29
P19827	Inter-alpha-trypsin inhibitor heavy chain H1	LDAQASFLPK	545.3	244.17	2+	y2+	70.9	29
P19827	Inter-alpha-trypsin inhibitor heavy chain H1	FAHYVVTSQVVNTANEAR	669.34	874.44	3+	y8+	79.9	47.8
P19827	Inter-alpha-trypsin inhibitor heavy chain H1	FAHYVVTSQVVNTANEAR	669.34	775.37	3+	y7+	79.9	47.8
P19827	Inter-alpha-trypsin inhibitor heavy chain H1	FAHYVVTSQVVNTANEAR	669.34	560.28	3+	y5+	79.9	47.8
P19827	Inter-alpha-trypsin inhibitor heavy chain H1	EVAFDLEIPK	580.81	932.51	2+	y8+	73.5	30.6
P19827	Inter-alpha-trypsin inhibitor heavy chain H1	EVAFDLEIPK	580.81	714.4	2+	y6+	73.5	30.6
P19827	Inter-alpha-trypsin inhibitor heavy chain H1	EVAFDLEIPK	580.81	244.17	2+	y2+	73.5	30.6
P19827	Inter-alpha-trypsin inhibitor heavy chain H1	AAISGENAGLVR	579.32	902.47	2+	y9+	73.3	30.5
P19827	Inter-alpha-trypsin inhibitor heavy chain H1	AAISGENAGLVR	579.32	815.44	2+	y8+	73.3	30.5
P19827	Inter-alpha-trypsin inhibitor heavy chain H1	AAISGENAGLVR	579.32	444.29	2+	y4+	73.3	30.5
P20742	Pregnancy zone protein	GSFALSFPVESDVAPIAR	931.99	1153.62	2+	y11+	99.1	46
P20742	Pregnancy zone protein	GSFALSFPVESDVAPIAR	931.99	456.29	2+	y4+	99.1	46
P20742	Pregnancy zone protein	AVGYLITGYQR	620.84	850.48	2+	y7+	76.4	32.3
P20742	Pregnancy zone protein	AVGYLITGYQR	620.84	737.39	2+	y6+	76.4	32.3
P20742	Pregnancy zone protein	AVGYLITGYQR	620.84	523.26	2+	y4+	76.4	32.3
P20851	C4b-binding protein beta chain	ALLAFQESK	503.78	822.44	2+	y7+	67.8	27.2
P20851	C4b-binding protein beta chain	ALLAFQESK	503.78	709.35	2+	y6+	67.8	27.2
P20851	C4b-binding protein beta chain	ALLAFQESK	503.78	638.31	2+	y5+	67.8	27.2
P20941	Phosducin OS=Homo sapiens	QFLETIEK	504.27	732.41	2+	y6+	67.9	27.2
P20941	Phosducin OS=Homo sapiens	QFLETIEK	504.27	619.33	2+	y5+	67.9	27.2
P20941	Phosducin OS=Homo sapiens	QFLETIEK	504.27	276.16	2+	y2+	67.9	27.2
P22792	Carboxypeptidase N subunit 2	LSNNALSGLPQGVFGK	801.44	989.54	2+	y10+	89.5	40.3
P22792	Carboxypeptidase N subunit 2	LSNNALSGLPQGVFGK	801.44	902.51	2+	y9+	89.5	40.3
P22792	Carboxypeptidase N subunit 2	LSNNALSGLPQGVFGK	801.44	732.4	2+	y7+	89.5	40.3
P27169	Serum paraoxonase/arylesterase 1	IFFYDSENPPASEVLR	942.46	1016.44	2+	b8+	99.8	46.5
P27169	Serum paraoxonase/arylesterase 1	IFFYDSENPPASEVLR	942.46	982.53	2+	y9+	99.8	46.5
P27169	Serum paraoxonase/arylesterase 1	IFFYDSENPPASEVLR	942.46	868.49	2+	y8+	99.8	46.5
P27169	Serum paraoxonase/arylesterase 1	YVYIAELLAHK	440.58	263.14	3+	b2+	63.2	34.6
P27169	Serum paraoxonase/arylesterase 1	YVYIAELLAHK	440.58	426.2	3+	b3+	63.2	34.6
P27169	Serum paraoxonase/arylesterase 1	YVYIAELLAHK	440.58	781.46	3+	y7+	63.2	34.6
P27169	Serum paraoxonase/arylesterase 1	LLIGTVFHK	514.32	227.18	2+	b2+	68.6	27.6
P27169	Serum paraoxonase/arylesterase 1	LLIGTVFHK	514.32	801.46	2+	y7+	68.6	27.6
P27169	Serum paraoxonase/arylesterase 1	LLIGTVFHK	514.32	688.38	2+	y6+	68.6	27.6
P27169	Serum paraoxonase/arylesterase 1	IQNILTEEPK	592.83	469.28	2+	b4+	74.3	31.1
P27169	Serum paraoxonase/arylesterase 1	IQNILTEEPK	592.83	943.51	2+	y8+	74.3	31.1
P27169	Serum paraoxonase/arylesterase 1	IQNILTEEPK	592.83	716.38	2+	y6+	74.3	31.1
P29622	Kallistatin	WADLSGITK	495.77	258.12	2+	b2+	67.3	26.8
P29622	Kallistatin	WADLSGITK	495.77	733.41	2+	y7+	67.3	26.8
P29622	Kallistatin	WADLSGITK	495.77	505.3	2+	y5+	67.3	26.8
P29622	Kallistatin	VGSALFLSHNLK	643.37	858.48	2+	y7+	78	33.3
P29622	Kallistatin	VGSALFLSHNLK	643.37	711.41	2+	y6+	78	33.3
P29622	Kallistatin	VGSALFLSHNLK	643.37	598.33	2+	y5+	78	33.3
P29622	Kallistatin	LGFTDLFSK	514.28	914.46	2+	y8+	68.6	27.6
P29622	Kallistatin	LGFTDLFSK	514.28	857.44	2+	y7+	68.6	27.6
P29622	Kallistatin	LGFTDLFSK	514.28	710.37	2+	y6+	68.6	27.6
P29622	Kallistatin	IAPANADFAFR	596.81	1008.49	2+	y9+	74.6	31.3
P29622	Kallistatin	IAPANADFAFR	596.81	840.4	2+	y7+	74.6	31.3
P29622	Kallistatin	IAPANADFAFR	596.81	540.29	2+	y4+	74.6	31.3
P29622	Kallistatin	FFSAQTNR	485.74	295.14	2+	b2+	66.5	26.4
P29622	Kallistatin	FFSAQTNR	485.74	676.34	2+	y6+	66.5	26.4
P29622	Kallistatin	FFSAQTNR	485.74	390.21	2+	y3+	66.5	26.4
P33151	Cadherin-5	HSIGYSIR	466.75	225.1	2+	b2+	65.1	25.5
P33151	Cadherin-5	HSIGYSIR	466.75	795.44	2+	y7+	65.1	25.5
P33151	Cadherin-5	HSIGYSIR	466.75	708.4	2+	y6+	65.1	25.5
P35858	Insulin-like growth factor-binding protein complex acid labile subunit	NLIAAVAPGAFLGLK	727.94	582.36	2+	b6+	84.2	37
P35858	Insulin-like growth factor-binding protein complex acid labile subunit	NLIAAVAPGAFLGLK	727.94	873.52	2+	y9+	84.2	37
P35858	Insulin-like growth factor-binding protein complex acid labile subunit	NLIAAVAPGAFLGLK	727.94	802.48	2+	y8+	84.2	37
P35858	Insulin-like growth factor-binding protein complex acid labile subunit	LAYLQPALFSGLAELR	881.5	589.33	2+	b5+	95.4	43.8
P35858	Insulin-like growth factor-binding protein complex acid labile subunit	LAYLQPALFSGLAELR	881.5	1173.66	2+	y11+	95.4	43.8
P35858	Insulin-like growth factor-binding protein complex acid labile subunit	LAYLQPALFSGLAELR	881.5	745.42	2+	y7+	95.4	43.8
P35858	Insulin-like growth factor-binding protein complex acid labile subunit	LAELPADALGPLQR	732.41	1037.57	2+	y10+	84.5	37.2
P35858	Insulin-like growth factor-binding protein complex acid labile subunit	LAELPADALGPLQR	732.41	570.34	2+	y5+	84.5	37.2
P36955	Pigment epithelium-derived factor	LQSLFDSPDFSK	692.34	1142.54	2+	y10+	81.6	35.5
P36955	Pigment epithelium-derived factor	LQSLFDSPDFSK	692.34	942.42	2+	y8+	81.6	35.5
P36955	Pigment epithelium-derived factor	LQSLFDSPDFSK	692.34	680.32	2+	y6+	81.6	35.5
P36955	Pigment epithelium-derived factor	ALYYDLISSPDIHGTYK	978.49	1104.53	2+	y10+	102.4	48.1
P36955	Pigment epithelium-derived factor	ALYYDLISSPDIHGTYK	978.49	1017.5	2+	y9+	102.4	48.1
P36955	Pigment epithelium-derived factor	ALYYDLISSPDIHGTYK	978.49	930.47	2+	y8+	102.4	48.1
P43251	Biotinidase	LSSGLVTAALYGR	654.37	850.48	2+	y8+	78.8	33.8
P43251	Biotinidase	LSSGLVTAALYGR	654.37	751.41	2+	y7+	78.8	33.8
P43251	Biotinidase	LSSGLVTAALYGR	654.37	395.2	2+	y3+	78.8	33.8
P43652	Afamin OS=Homo sapiens	FTFEYSR	475.22	249.12	2+	b2+	65.8	25.9
P43652	Afamin OS=Homo sapiens	FTFEYSR	475.22	701.33	2+	y5+	65.8	25.9
P43652	Afamin OS=Homo sapiens	FTFEYSR	475.22	425.21	2+	y3+	65.8	25.9
P48740	Mannan-binding lectin serine protease 1	YGVYSYIHHNK	460.89	221.09	3+	b2+	64.7	35.7
P48740	Mannan-binding lectin serine protease 1	YGVYSYIHHNK	460.89	320.16	3+	b3+	64.7	35.7
P50213	Isocitrate dehydrogenase [NAD] subunit alpha, mitochondrial	IAEFAFEYAR	608.8	756.37	2+	y6+	75.5	31.8
P50213	Isocitrate dehydrogenase [NAD] subunit alpha, mitochondrial	IAEFAFEYAR	608.8	685.33	2+	y5+	75.5	31.8
P50213	Isocitrate dehydrogenase [NAD] subunit alpha, mitochondrial	IAEFAFEYAR	608.8	538.26	2+	y4+	75.5	31.8
P51884	Lumican OS=Homo sapiens	ISNIPDEYFK	613.31	315.17	2+	b3+	75.8	32
P51884	Lumican OS=Homo sapiens	ISNIPDEYFK	613.31	428.25	2+	b4+	75.8	32
P51884	Lumican OS=Homo sapiens	ISNIPDEYFK	613.31	798.37	2+	y6+	75.8	32
P51884	Lumican OS=Homo sapiens	FNALQYLR	512.78	763.45	2+	y6+	68.5	27.6
P51884	Lumican OS=Homo sapiens	FNALQYLR	512.78	692.41	2+	y5+	68.5	27.6
P51884	Lumican OS=Homo sapiens	FNALQYLR	512.78	579.32	2+	y4+	68.5	27.6
P68871	Hemoglobin subunit beta	VNVDEVGGEALGR	657.84	1002.49	2+	y10+	79.1	33.9
P68871	Hemoglobin subunit beta	VNVDEVGGEALGR	657.84	758.42	2+	y8+	79.1	33.9
P68871	Hemoglobin subunit beta	VNVDEVGGEALGR	657.84	416.26	2+	y4+	79.1	33.9
P68871	Hemoglobin subunit beta	SAVTALWGK	466.76	774.45	2+	y7+	65.1	25.5
P68871	Hemoglobin subunit beta	SAVTALWGK	466.76	675.38	2+	y6+	65.1	25.5
P68871	Hemoglobin subunit beta	SAVTALWGK	466.76	574.33	2+	y5+	65.1	25.5
P68871	Hemoglobin subunit beta	EFTPPVQAAYQK	689.85	671.34	2+	b6+	81.4	35.4
P68871	Hemoglobin subunit beta	EFTPPVQAAYQK	689.85	1001.54	2+	y9+	81.4	35.4
P68871	Hemoglobin subunit beta	EFTPPVQAAYQK	689.85	904.49	2+	y8+	81.4	35.4
P69905	Hemoglobin subunit alpha	VGAHAGEYGAEALER	510.58	617.33	3+	y5+	68.3	38.6
P69905	Hemoglobin subunit alpha	VGAHAGEYGAEALER	510.58	488.28	3+	y4+	68.3	38.6
P69905	Hemoglobin subunit alpha	VGAHAGEYGAEALER	510.58	417.25	3+	y3+	68.3	38.6
P69905	Hemoglobin subunit alpha	TYFPHFDLSHGSAQVK	917.45	1188.6	2+	y11+	98	45.4
P69905	Hemoglobin subunit alpha	TYFPHFDLSHGSAQVK	917.45	1041.53	2+	y10+	98	45.4
P80108	Phosphatidylinositol-glycan-specific phospholipase D	IADVTSGLIGGEDGR	730.37	703.34	2+	y7+	84.4	37.1
P80108	Phosphatidylinositol-glycan-specific phospholipase D	IADVTSGLIGGEDGR	730.37	590.25	2+	y6+	84.4	37.1
Q13790	Apolipoprotein F OS=Homo sapiens	SGVQQLIQYYQDQK	849.43	1085.53	2+	y8+	93	42.4
Q13790	Apolipoprotein F OS=Homo sapiens	SGVQQLIQYYQDQK	849.43	972.44	2+	y7+	93	42.4
Q13790	Apolipoprotein F OS=Homo sapiens	SGVQQLIQYYQDQK	849.43	681.32	2+	y5+	93	42.4
Q14624	Inter-alpha-trypsin inhibitor heavy chain H4	LGVYELLLK	524.33	934.56	2+	y8+	69.3	28.1
Q14624	Inter-alpha-trypsin inhibitor heavy chain H4	LGVYELLLK	524.33	877.54	2+	y7+	69.3	28.1
Q14624	Inter-alpha-trypsin inhibitor heavy chain H4	LGVYELLLK	524.33	778.47	2+	y6+	69.3	28.1
Q14624	Inter-alpha-trypsin inhibitor heavy chain H4	ILDDLSPR	464.76	227.18	2+	b2+	65	25.4
Q14624	Inter-alpha-trypsin inhibitor heavy chain H4	ILDDLSPR	464.76	702.34	2+	y6+	65	25.4
Q14624	Inter-alpha-trypsin inhibitor heavy chain H4	ILDDLSPR	464.76	359.2	2+	y3+	65	25.4
Q14624	Inter-alpha-trypsin inhibitor heavy chain H4	FKPTLSQQQK	602.84	276.17	2+	b2+	75.1	31.5
Q14624	Inter-alpha-trypsin inhibitor heavy chain H4	FKPTLSQQQK	602.84	930.5	2+	b8+	75.1	31.5
Q14624	Inter-alpha-trypsin inhibitor heavy chain H4	FKPTLSQQQK	602.84	929.51	2+	y8+	75.1	31.5
Q15166	Serum paraoxonase/lactonase 3	ILIGTVFHK	514.32	227.18	2+	b2+	68.6	27.6
Q15166	Serum paraoxonase/lactonase 3	ILIGTVFHK	514.32	801.46	2+	y7+	68.6	27.6
Q15166	Serum paraoxonase/lactonase 3	ILIGTVFHK	514.32	688.38	2+	y6+	68.6	27.6
Q496Y0	LON peptidase N-terminal domain and RING finger protein 3	QVEAALLK	436.27	644.4	2+	y6+	62.9	24.2
Q496Y0	LON peptidase N-terminal domain and RING finger protein 3	QVEAALLK	436.27	515.36	2+	y5+	62.9	24.2
Q6YP21	Kynurenine--oxoglutarate transaminase 3	ILGFSTSAK	462.26	706.38	2+	b7+	64.8	25.3
Q6YP21	Kynurenine--oxoglutarate transaminase 3	ILGFSTSAK	462.26	697.35	2+	y7+	64.8	25.3
Q6YP21	Kynurenine--oxoglutarate transaminase 3	ILGFSTSAK	462.26	218.15	2+	y2+	64.8	25.3
Q6ZMY9	Zinc finger protein 517	QSSILLR	408.75	688.44	2+	y6+	60.9	23
Q6ZMY9	Zinc finger protein 517	QSSILLR	408.75	601.4	2+	y5+	60.9	23
Q6ZMY9	Zinc finger protein 517	QSSILLR	408.75	401.29	2+	y3+	60.9	23
Q92954	Proteoglycan 4	GFGGLTGQIVAALSTAK	795.95	1159.67	2+	y12+	89.1	40
Q92954	Proteoglycan 4	GFGGLTGQIVAALSTAK	795.95	1058.62	2+	y11+	89.1	40
Q92954	Proteoglycan 4	GFGGLTGQIVAALSTAK	795.95	760.46	2+	y8+	89.1	40
Q96PD5	N-acetylmuramoyl-L-alanine amidase	AGLLRPDYALLGHR	517.96	595.37	3+	y5+	68.9	39
Q96PD5	N-acetylmuramoyl-L-alanine amidase	AGLLRPDYALLGHR	517.96	482.28	3+	y4+	68.9	39
Q96PD5	N-acetylmuramoyl-L-alanine amidase	AGLLRPDYALLGHR	517.96	369.2	3+	y3+	68.9	39
Q9NRJ5	Poly(A) polymerase beta	YHWEHTGLTLR	471.57	301.13	3+	b2+	65.5	36.4
Q9NRJ5	Poly(A) polymerase beta	YHWEHTGLTLR	471.57	660.4	3+	y6+	65.5	36.4
Q9NRJ5	Poly(A) polymerase beta	YHWEHTGLTLR	471.57	559.36	3+	y5+	65.5	36.4
Q9NRJ5	Poly(A) polymerase beta	LATALSLSNK	509.3	833.47	2+	y8+	68.2	27.4
Q9NRJ5	Poly(A) polymerase beta	LATALSLSNK	509.3	661.39	2+	y6+	68.2	27.4
Q9NRJ5	Poly(A) polymerase beta	LATALSLSNK	509.3	548.3	2+	y5+	68.2	27.4
Q9NRJ5	Poly(A) polymerase beta	EVGTVLSQVYSK	655.35	824.45	2+	y7+	78.9	33.8
Q9NRJ5	Poly(A) polymerase beta	EVGTVLSQVYSK	655.35	711.37	2+	y6+	78.9	33.8
Q9NRJ5	Poly(A) polymerase beta	EVGTVLSQVYSK	655.35	624.34	2+	y5+	78.9	33.8
Q9NZP8	Complement C1r subcomponent-like protein	LGNFPWQAFTSIHGR	577.63	285.16	3+	b3+	73.2	42.5
Q9NZP8	Complement C1r subcomponent-like protein	LGNFPWQAFTSIHGR	577.63	432.22	3+	b4+	73.2	42.5
Q9NZP8	Complement C1r subcomponent-like protein	LGNFPWQAFTSIHGR	577.63	670.36	3+	y6+	73.2	42.5
Q9UK55	Protein Z-dependent protease inhibitor	IFSPFADLSELSATGR	855.94	820.42	2+	y8+	93.5	42.7
Q9UK55	Protein Z-dependent protease inhibitor	IFSPFADLSELSATGR	855.94	491.26	2+	y5+	93.5	42.7
Q9Y2M2	Protein SSUH2 homolog	PSPVGLLR	419.76	185.09	2+	b2+	61.7	23.5
Q9Y2M2	Protein SSUH2 homolog	PSPVGLLR	419.76	654.43	2+	y6+	61.7	23.5
Q9Y2M2	Protein SSUH2 homolog	PSPVGLLR	419.76	401.29	2+	y3+	61.7	23.5
Q9Y6K1	DNA (cytosine-5)-methyltransferase 3A	DPAVISK	365.21	213.09	2+	b2+	57.7	21.1
Q9Y6K1	DNA (cytosine-5)-methyltransferase 3A	DPAVISK	365.21	517.33	2+	y5+	57.7	21.1
P02771	Alpha-fetoprotein	TFQAITVTK	504.79	561.3	2+	b5+	67.9	27.2
P02771	Alpha-fetoprotein	TFQAITVTK	504.79	761.42	2+	b7+	67.9	27.2
P02771	Alpha-fetoprotein	TFQAITVTK	504.79	760.46	2+	y7+	67.9	27.2
P02771	Alpha-fetoprotein	TFQAITVTK	504.79	632.4	2+	y6+	67.9	27.2
P02771	Alpha-fetoprotein	TFQAITVTK	504.79	561.36	2+	y5+	67.9	27.2
P02771	Alpha-fetoprotein	QEFLINLVK	552.33	745.39	2+	b6+	71.4	29.3
P02771	Alpha-fetoprotein	QEFLINLVK	552.33	846.54	2+	y7+	71.4	29.3
P02771	Alpha-fetoprotein	QEFLINLVK	552.33	699.48	2+	y6+	71.4	29.3
P02771	Alpha-fetoprotein	QEFLINLVK	552.33	586.39	2+	y5+	71.4	29.3
